# Supplementary material for: Effectiveness of endothelial progenitor cell culture under microgravity for improved angiogenic potential
Source: PubMed Central journal article supplement (PMC6155294; doi:10.1038/s41598-018-32073-2), 2018-09-24
Supplement: 41598_2018_32073_MOESM1_ESM.pdf [file 41598_2018_32073_MOESM1_ESM.pdf]

## Supplementary Information

### Effectiveness of endothelial progenitor cell culture under microgravity for improved angiogenic potential

Hiroko Hagiwara, Akira Higashibata, Shiho Ogawa, Shigeyuki Kanazawa, Hiroshi Mizuno & Rica Tanaka

**Supplementary Table S1.** Expression levels of surface markers by flow cytometry analysis of MNC and QQMNC

| %     | PBMNC           | NC            | EG             | MG             | ME            |
|-------|-----------------|---------------|----------------|----------------|---------------|
| CD34  | 0.27 ± 0.29     | 1.12 ± 0.61   | 1.38 ± 3.02    | 4.90 ± 2.71*†  | 5.50 ± 3.68*† |
| CD206 | 4.12 ± 7.28     | 28.62 ± 1.61  | 12.02 ± 3.30** | 12.11 ± 4.08** | 9.35 ± 4.58** |
| CCR2  | 21.28 ± 9.54*** | 0.98 ± 0.83   | 0.30 ± 0.39    | 0.20 ± 0.27    | 0.19 ± 0.29   |
| CXCR4 | 75.0 ± 21.21    | 89.80 ± 2.79  | 89.73 ± 2.35   | 91.20 ± 2.78   | 88.7 ± 0.76   |
| CD31  | 48.53 ± 18.90   | 68.40 ± 5.07  | 56.03 ± 6.62   | 57.14 ± 10.22  | 56.92 ± 8.04* |
| CD3   | 56.02 ± 7.49    | 53.88 ± 21.49 | 51.39 ± 30.60  | 68.75 ± 8.61   | 65.69 ± 5.36  |

\*:p < 0.05 vs. NC, \*\*:p < 0.01 vs. NC, \*\*\*:p < 0.005 vs. NC,

†:p < 0.05 vs. EG

**Supplementary Table S2.** Antibodies (A) and isotype (B) antibodies used in flow cytometry

A

| Antibody                 | Isotype     | Company, Catalog No.         |
|--------------------------|-------------|------------------------------|
| CD34-PE                  | Mouse IgG1  | BioLegend, 343506            |
| CD206-PE-Cy7             | Mouse IgG1  | BioLegend, 400125            |
| CD31-FITC                | Mouse IgG1  | BioLegend, 303104            |
| CXCR4-APC                | Mouse IgG1  | BD, 555976                   |
| CD3-Alexa700             | Mouse IgG1  | BioLegend, 300424            |
| CD4-FITC                 | Mouse IgG1  | Biolegend, 300506            |
| CD8a-Brilliant violet421 | Mouse IgG1  | BioLegend, 301036            |
| CD14-APC-Cy7             | Mouse IgG1  | BioLegend, 325620            |
| CCR2-PerCP-Cy5.5         | Mouse IgG2a | BioLegend, 357204            |
| CD133-APC                | Mouse IgG1  | Miltenyi Biotec, 130-090-826 |

PE = phycoerythrin; APC = allophycocyanin; CXCR4 = C-X-C chemokine receptor type 4; CCR2 = chemokine receptor 2

B

| Antibody                    | Company, Catalog No. |
|-----------------------------|----------------------|
| Mouse IgG1 $\kappa$ -PE     | BD, 555749           |
| Mouse IgG1 $\kappa$ -PE-Cy7 | BioLegend, 400252    |

---

|                                          |                         |
|------------------------------------------|-------------------------|
| Mouse IgG1 $\kappa$ -FITC                | BD, 555748              |
| Mouse IgG1 $\kappa$ -APC                 | Beckman-Coulter, IM2475 |
| Mouse IgG1 $\kappa$ -Alexa700            | BioLegend, 400144       |
| Mouse IgG1 $\kappa$ -Brilliant violet421 | BioLegend, 400158       |
| Mouse IgG1 $\kappa$ -APC-Cy7             | BioLegend, 400128       |
| Mouse IgG2a $\kappa$ -PerCP-Cy5.5        | BioLegend, 357204       |

---

PE = phycoerythrin; APC = allophycocyanin

**Supplementary Table S3.** Human PCR primers for qRT-PCR in MNC and QQMNC

| <b>Gene</b>    | <b>Forward Primer</b>         | <b>Reverse Primer</b>            |
|----------------|-------------------------------|----------------------------------|
| VEGF-A         | 5'-TCACCATGCAGATTATGCGGA -3'  | 5'-ACCAACGTACACGCTCCAG -3'       |
| VEGF-B         | 5'-AGGTGACACATGGCTTTTCAG -3'  | 5'-GTTCCCCCACTGGGATATAGC-3'      |
| VEGF-R2 / KDR  | 5'-GGCCCAATAATCAGAGTGGCA-3'   | 5'-CCAGTGTCAATTCCGATCACTTT-3'    |
| VEGF-R1 / Flt1 | 5'-TTTGCCCGAAATGGTGAGTAAGG-3' | 5'-TGGTTTGCTTGAGCTGTGTTC-3'      |
| ANG-1          | 5'-GCCCTAAGCCATCAGCAATC -3'   | 5'-GGTTGCACATCCAAGCCAAG-3'       |
| ANG-2          | 5'-ACCTGTTGAACCAAACAGCG-3'    | 5'-GTCGAGAGGGAGTGTTCCAAG-3'      |
| IGF            | 5'-GCCCAAATGCACTGATGTAAA-3'   | 5'-AGTGACTTTGCTATGAGTTGGTGAGT-3' |
| HGF            | 5'-CGTAGCGTACCTCTGGATTGC-3'   | 5'-GCTATCGGGGTAAAGACCTACA-3'     |
| PDGF           | 5'-GCAAGACCAGGACGGTCATTT-3'   | 5'-GGCACTTGACACTGCTCGT-3'        |
| FGF-1          | 5'-AATGGGAGCTGCAAACGCGGTCC-3' | 5'-TCAACCAGGTGAGGACCCCTCGA-3'    |

|                |                                 |                                  |
|----------------|---------------------------------|----------------------------------|
| MMP2           | 5'-GGTTCCCCTGTTCACCTACTTAGC-3'  | 5'-CGGCTTGGTTTTCTCCAT-3'         |
| MMP9           | 5'-AGACCTGGGCAGATTCCAAAC-3'     | 5'-CGGCAAGTCTTCCGAGTAGT-3'       |
| SOD            | 5'-TTTGCGTCGTAGTCTCCTGC -3'     | 5'-CCACACCTTCACTGGTCCAT-3'       |
| e-NOS          | 5'-TACAGGCTAAAACCTTAGAAGAGGA-3' | 5'-CTGACAGCTTCCAGATGCC-3'        |
| TNF- $\alpha$  | 5'-GAGACCAGGGAGCCTTTGGT-3'      | 5'-TGTGTCAATTTCTAGGTGAGGTCTTC-3' |
| Leptin         | 5'-TCACTAGATGGCGAGCATCCT -3'    | 5'-CACGCTCAGCTAACTTTTGTGTTT-3'   |
| $\beta$ -actin | 5'-GTCATTCCAAATATGAGATGCGTTG-3' | 5'-TGTGGACTTGGGAGAGGACT-3'       |

qRT-PCR = quantitative real-time polymerase chain reaction; ANG = angiotensin; IGF = insulin-like growth factor; HGF = hepatocyte growth factor; PDGF = platelet-derived growth factor; FGF = fibroblast growth factor; MMP = matrix metalloproteinase; SOD = superoxide dismutase; NOS = nitric oxide synthase; TNF = tumour necrosis factor.

**Supplementary Figure S1:**

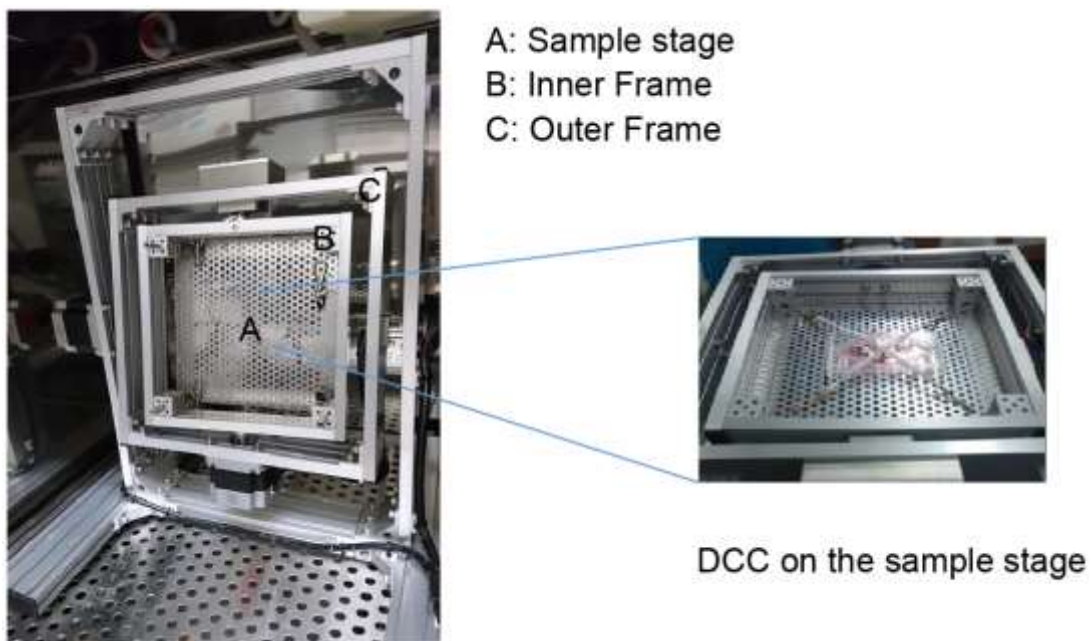

Fig S1: Photograph of the 3D-clinostat. The image shows the inner and outer frames and sample stage with a disposable cultivation chamber (DCC).

**Supplementary Figure S2:**

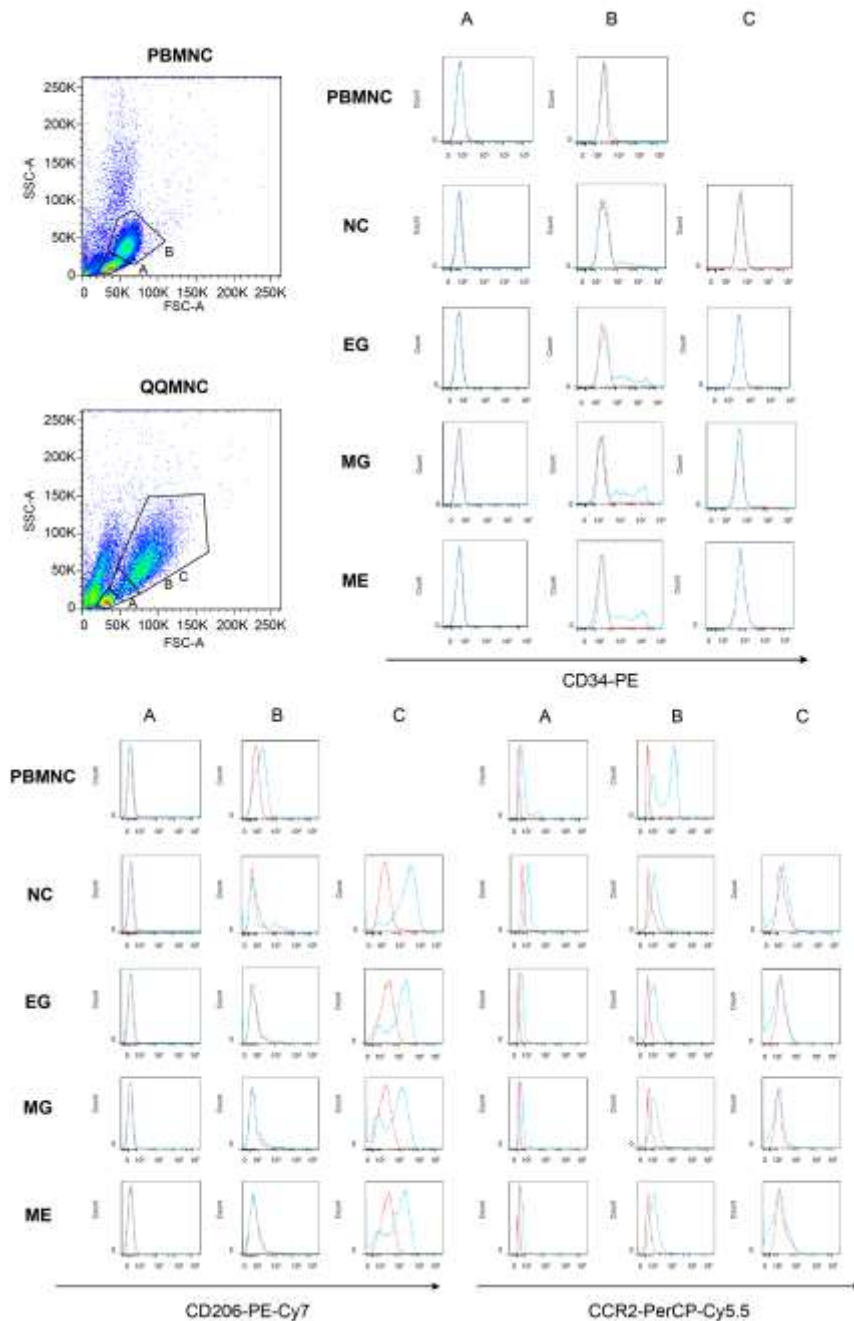

Fig S2: Flow cytometry data for surface staining of CD34, CD206, and CCR2. After culturing for 7 days, PBMNC showed 2 cell populations whereas there were 3 populations for QQMNC. We first gated the cells into these populations and labelled them as A, B, and C. Positive cells were determined by histogram overlays using isotype controls as a sum of the percentage of cells in gates A, B and C for QQMNC or the percentage of cells in gate A and B for PBMNC.

Supplementary Figure S3:

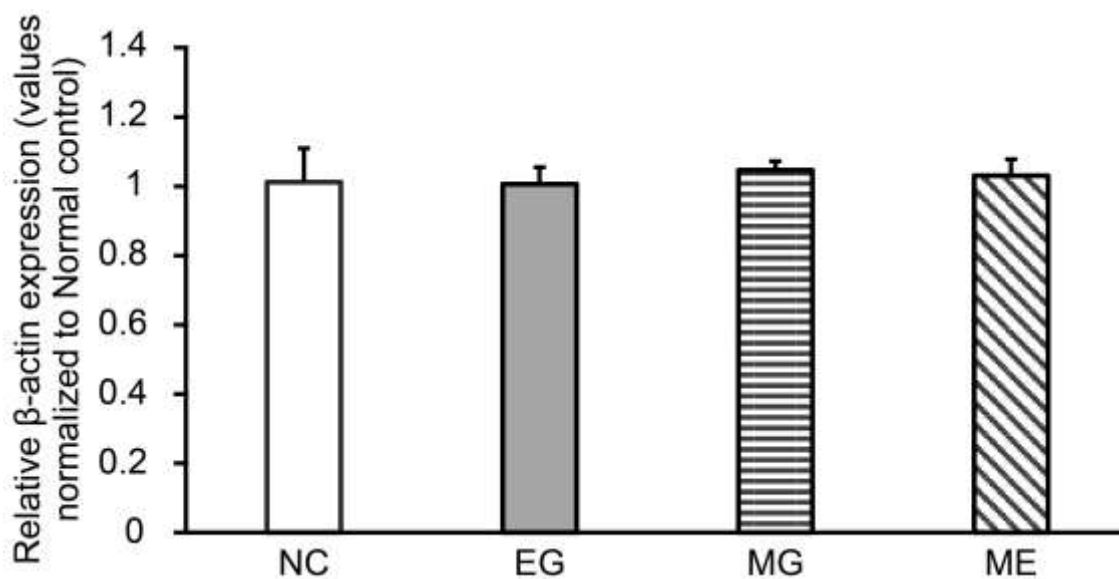

Fig. S3: Quantitative PCR for QQMNC under different gravity conditions for  $\beta$ -actin. Values represent mean  $\pm$  SD from 21 culture samples.
